# Supplementary material
Source: Springer Nature journal article supplement (https://www.springermedizin.de/resource/supplementary/13045_2009_92_MOESM4_ESM.pdf/9660736)

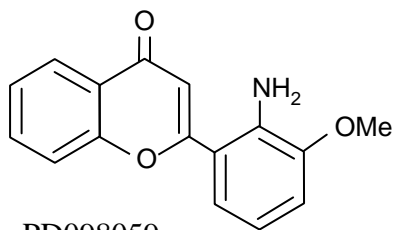

PD098059

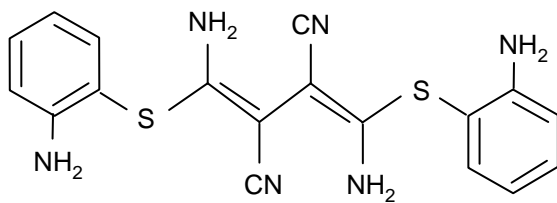

U0126

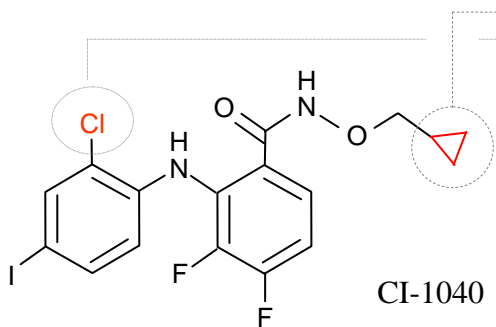

CI-1040

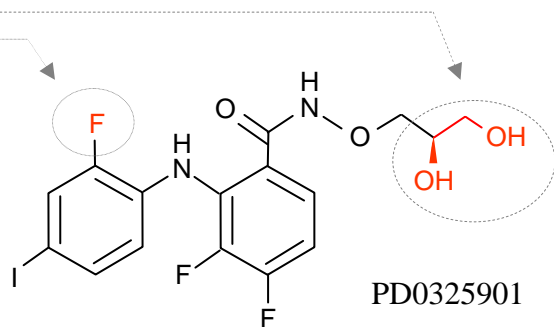

PD0325901

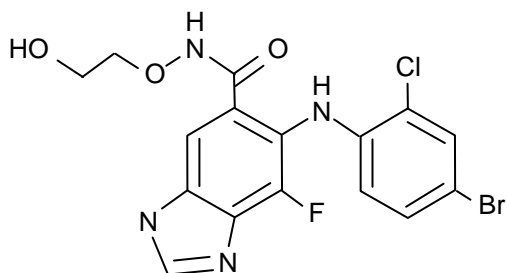

AZD6244

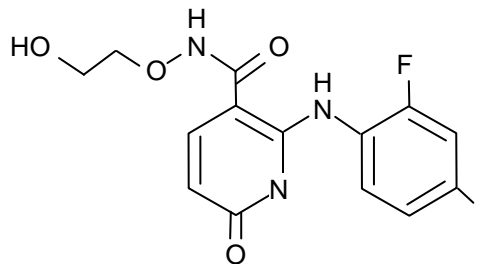

AZD8330

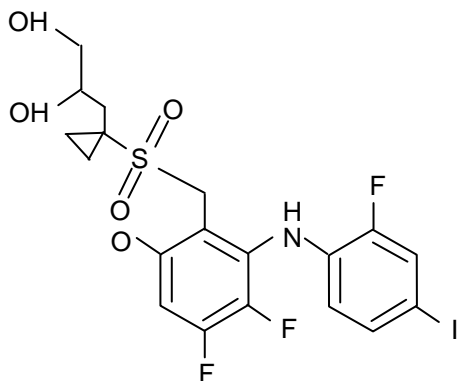

RDEA119

Supplement: MOESM4 [file 9660736]
